## Correction

# Correction: DUF1220 Dosage Is Linearly Associated with Increasing Severity of the Three Primary Symptoms of Autism

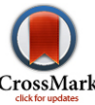

### The *PLOS Genetics* Staff

In the Results section the last two sentences are incorrect. The corrected sentences can be seen below.

Incorrect sentences:

Diagnostic scores were moderately correlated with CON1 copy number, exhibiting a Pearson's  $r$  of 0.49 and 0.67 in social and communicative domains, respectively. Repetitive behavior score demonstrated a more modest correlation with CON1 copy number, with a Pearson's  $r$  of 0.26.

Corrected sentences:

As might be expected diagnostic scores were moderately correlated with each other, ranging from a Pearson's  $r$  of 0.49 to 0.67 in social and communicative domains on the measures utilized. However repetitive behavior score was not as correlated with social and communicative domains ranging from Pearson's  $r$  of 0.26 to 0.55.

### References

1. Davis JM, Searles VB, Anderson N, Keeney J, Dumas L, et al. (2014) DUF1220 Dosage Is Linearly Associated with Increasing Severity of the Three Primary Symptoms of Autism. *PLoS Genet* 10(3): e1004241. doi:10.1371/journal.pgen.1004241

**Citation:** The *PLOS Genetics* Staff (2014) Correction: DUF1220 Dosage Is Linearly Associated with Increasing Severity of the Three Primary Symptoms of Autism. *PLoS Genet* 10(4): e1004373. doi:10.1371/journal.pgen.1004373

**Published:** April 11, 2014

**Copyright:** © 2014 The *PLOS Genetics* Staff. This is an open-access article distributed under the terms of the Creative Commons Attribution License, which permits unrestricted use, distribution, and reproduction in any medium, provided the original author and source are credited.
